# Supplementary material for: Mesenchymal Stem Cells Engineered by Nonviral Vectors: A Powerful Tool in Cancer Gene Therapy
Source: MDPI journal article supplement (doi:10.3390/pharmaceutics13060913), 2021-06-21
Supplement: s1 [file s1]

# Mesenchymal Stem Cells Engineered by Nonviral Vectors: A Powerful Tool in Cancer Gene Therapy

Yuan Ding, Chenyang Wang, Zhongquan Sun, Yingsheng Wu, Wanlu You, Zhengwei Mao and Weilin Wang

**Table S1.** The efficiency of non-viral strategies for MSC engineering.

| Factor            | Transfection Method           | Vector                     | Efficiency | Cell Death | Reference |
|-------------------|-------------------------------|----------------------------|------------|------------|-----------|
| TRAIL             | Photochemical internalization | Branched PEI               | >10 fold   | <5%        | [1]       |
| CD (5-FC)         | Fusogenic lipids              | Linear PEI                 | ~80%       | <5%        | [2]       |
| CXCR4             | Microporation electroporation | Minicircles                | ~66%       | 4%–13%     | [3]       |
| —                 | VEGFR-1 targeted              | Biomimetic vectors         | Over 50%   | <25%       | [4]       |
| GFP               | GD2 targeted                  | PEG-g-PEI-SP IO            | ~60%       | <20%       | [5]       |
| —                 | nAChR targeted                | RVG-PAM-A BP               | ~60%       | <5%        | [6]       |
| BMP2              | 3D tissue engineered scaffold | Dex-tran-plasmid           | ~7 fold    | —          | [7]       |
| Ascl1, Brn2, Sox2 | —                             | Carbon dots                | >10 fold   | <5%        | [8]       |
| GFP               | pEGFP and pLuc                | PEI-modified nanoparticles | ~75%       | —          | [9]       |
| Sox9              | Lipofectamine                 | Minicircle                 | ~40%       | —          | [10]      |
| siRNA             | Opti-MEM                      | PIC                        | 85%–93%    | <20%       | [11]      |
| GFP               | —                             | pDNA/PEI/H A               | ~2 fold    | —          | [12]      |
| SOX9              | pEGFP and pLuc                | PLGA                       | 75%        | —          | [13]      |

## References

- Han, J.; Hwang, H.S.; Na, K. TRAIL-secreting human mesenchymal stem cells engineered by a non-viral vector and photochemical internalization for pancreatic cancer gene therapy. *Biomaterials* **2018**, *182*, 259–268.
- Ho, Y.K.; Woo, J.Y.; Tu, G.X.E.; Deng, L.W.; Too, H.P. A highly efficient non-viral process for programming mesenchymal stem cells for gene directed enzyme prodrug cancer therapy. *Sci. Rep.* **2020**, *10*, 14257.
- Mun, J.Y.; Shin, K.K.; Kwon, O.; Lim, Y.T.; Oh, D.B. Minicircle microporation-based non-viral gene delivery improved the targeting of mesenchymal stem cells to an injury site. *Biomaterials* **2016**, *101*, 310–320.
- Chen, X.; Nomani, A.; Patel, N.; Nouri, F.S.; Hatefi, A. Bioengineering a non-genotoxic vector for genetic modification of mesenchymal stem cells. *Biomaterials* **2018**, *152*, 1–14.
- Pang, P.; Wu, C.; Shen, M.; Gong, F.; Zhu, K.; Jiang, Z.; Guan, S.; Shan, H.; Shuai, X. An MRI-visible non-viral vector bearing GD2 single chain antibody for targeted gene delivery to human bone marrow mesenchymal stem cells. *PloS One* **2013**, *8*, e76612.
- Beloor, J.; Ramakrishna, S.; Nam, K.; Seon Choi, C.; Kim, J.; Kim, S.H.; Cho, H.J.; Shin, H.; Kim, H.; Kim, S.W., et al. Effective gene delivery into human stem cells with a cell-targeting Peptide-modified bio-reducible polymer. *Small* **2015**, *11*, 2069–2079.
- Hosseinkhani, H.; Azzam, T.; Kobayashi, H.; Hiraoka, Y.; Shimokawa, H.; Domb, A.J.; Tabata, Y. Combination of 3D tissue engineered scaffold and non-viral gene carrier enhance in vitro DNA expression of mesenchymal stem cells. *Biomaterials* **2006**, *27*, 4269–4278.
- Chen, J.; Wang, Q.; Zhou, J.; Deng, W.; Yu, Q.; Cao, X.; Wang, J.; Shao, F.; Li, Y.; Ma, P., et al. Porphyrin polysaccharide-derived carbon dots for non-viral co-delivery of different gene combinations and neuronal differentiation of ectodermal mesenchymal stem cells. *Nanoscale* **2017**, *9*, 10820–10831.
- Park, J.S.; Na, K.; Woo, D.G.; Yang, H.N.; Kim, J.M.; Kim, J.H.; Chung, H.M.; Park, K.H. Non-viral gene delivery of DNA polyplexed with nanoparticles transfected into human mesenchymal stem cells. *Biomaterials* **2010**, *31*, 124–132.

10. Tidd, N.; Michelsen, J.; Hilbert, B.; Quinn, J.C. Minicircle Mediated Gene Delivery to Canine and Equine Mesenchymal Stem Cells. *Int. J. Mol. Sci.* **2017**, *18*, 819.
11. Raisin, S.; Morille, M.; Bony, C.; Noël, D.; Devoisselle, J.M.; Belamie, E. Tripartite polyionic complex (PIC) micelles as non-viral vectors for mesenchymal stem cell siRNA transfection. *Biomater. Sci.* **2017**, *5*, 1910–1921.
12. Cho, S.H.; Noh, Y.W.; Cho, M.Y.; Lim, Y.T. An Electrostatically Self-Assembled Ternary Nanocomplex as a Non-Viral Vector for the Delivery of Plasmid DNA into Human Adipose-Derived Stem Cells. *Molecules* **2016**, *21*, 572.
13. Kim, J.H.; Park, J.S.; Yang, H.N.; Woo, D.G.; Jeon, S.Y.; Do, H.J.; Lim, H.Y.; Kim, J.M.; Park, K.H. The use of biodegradable PLGA nanoparticles to mediate SOX9 gene delivery in human mesenchymal stem cells (hMSCs) and induce chondrogenesis. *Biomaterials* **2011**, *32*, 268–278.
